# Supplementary material for: The M1 muscarinic receptor is present in situ as a ligand-regulated mixture of monomers and oligomeric complexes
Source: PubMed Central journal article supplement (PMC9214538; doi:10.1073/pnas.2201103119), 2022-06-07
Supplement: pnas.2201103119.sapp.pdf [file pnas.2201103119.sapp.pdf]

**Supplementary Information for**

**The M<sub>1</sub> muscarinic receptor is present *in situ* as a ligand-regulated mixture of monomers  
and oligomeric complexes**

**Sara Marsango<sup>1</sup>, Laura Jenkins<sup>1</sup>, John D. Padiani<sup>1</sup>, Sophie J. Bradley<sup>1,3</sup>, Richard J.  
Ward<sup>1</sup>, Sarah Hesse<sup>1</sup>, Gabriel Biener<sup>2</sup>, Michael R. Stoneman<sup>2</sup>, Andrew B. Tobin<sup>1</sup>,**

**Valerica Raicu<sup>2</sup> and Graeme Milligan<sup>1\*</sup>**

- 1. Centre for Translational Pharmacology, Institute of Molecular, Cell and Systems  
Biology, College of Medical, Veterinary and Life Sciences, University of Glasgow,  
Glasgow G12 8QQ, Scotland, U.K.**
- 2. Physics Department, University of Wisconsin-Milwaukee, WI, USA**
- 3. Current address: SoseiHeptares, Steinmetz Building, Granta Park, Cambridge,  
CB21 6DG U.K.**

**Address correspondence to Graeme Milligan, Centre for Translational Pharmacology,  
Wolfson Link Building 253 , University of Glasgow, Glasgow G12 8QQ, Scotland, U.K.  
(+44 141 330 5557) ([Graeme.Milligan@glasgow.ac.uk](mailto:Graeme.Milligan@glasgow.ac.uk))**

This file includes: Figures S1 to S4

## Supporting information 1

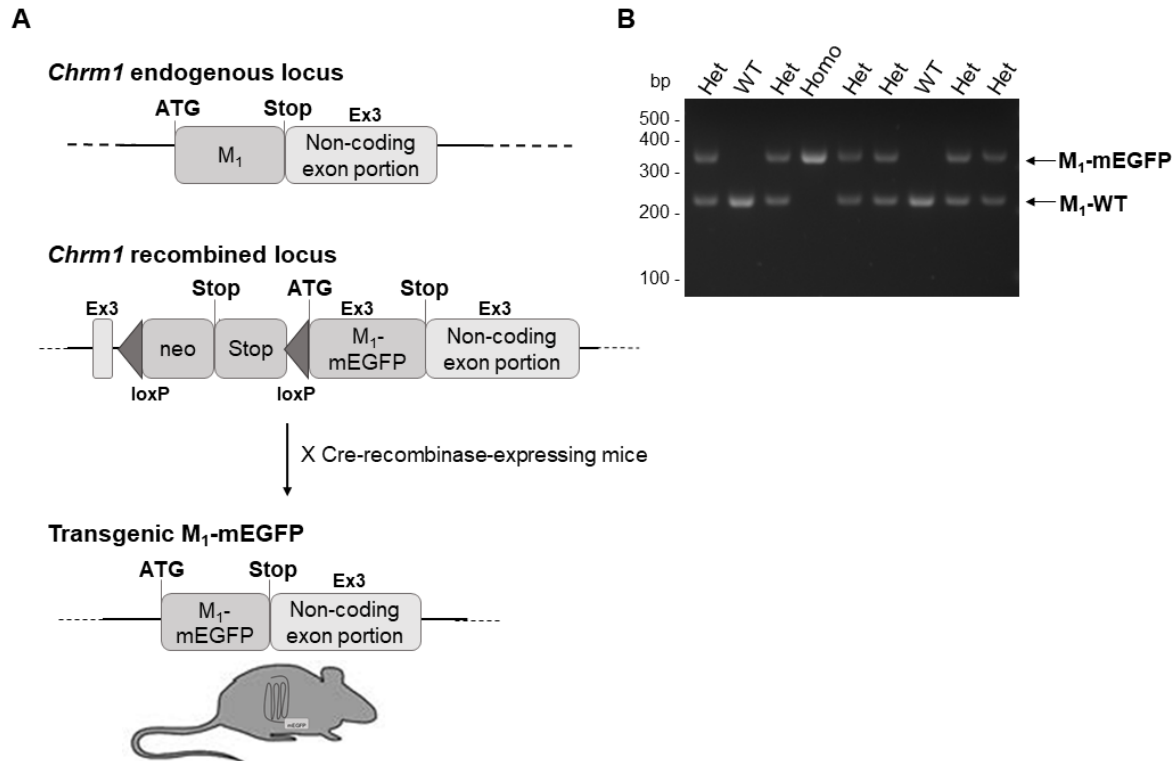

### SI 1: Genotyping identifies mice both homozygous and heterozygous for expression of *M<sub>1</sub>-mEGFP*

Transgenic *M<sub>1</sub>-mEGFP* expressing knock-in mice were generated as illustrated (A). Primers (sequences in Methods) designed to amplify mouse *M<sub>1</sub>* receptor (223bp) or *M<sub>1</sub>-mEGFP* (332bp) were used to PCR amplify cDNA isolated from the various mice used in these studies (B). WT = wild type, Het = heterozygote, Homo = homozygote *M<sub>1</sub>-mEGFP* knock-in.

Supporting information 2

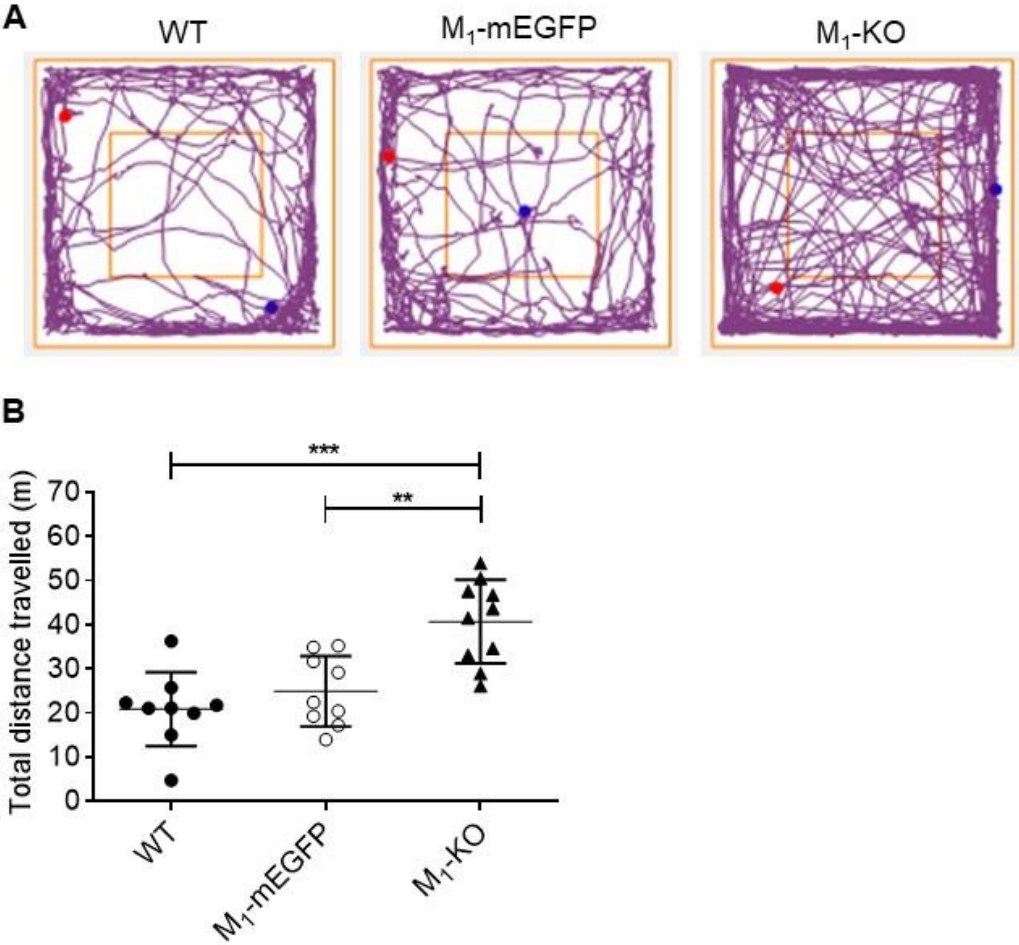

SI 2: Locomotor activity of M<sub>1</sub>-mEGFP expressing mice is not different from wild type

Representative motion plots of wild type, homozygous M<sub>1</sub>-mEGFP knock-in or M<sub>1</sub>-knock-out (M<sub>1</sub>-KO) mice in open field tests (A). B. Average distance traveled by such animals over a 10 min period in the open field test (\*\* P < 0.01, \*\*\* P < 0.001). Data for individual animals (n = 9-10) are shown.

### Supporting information 3

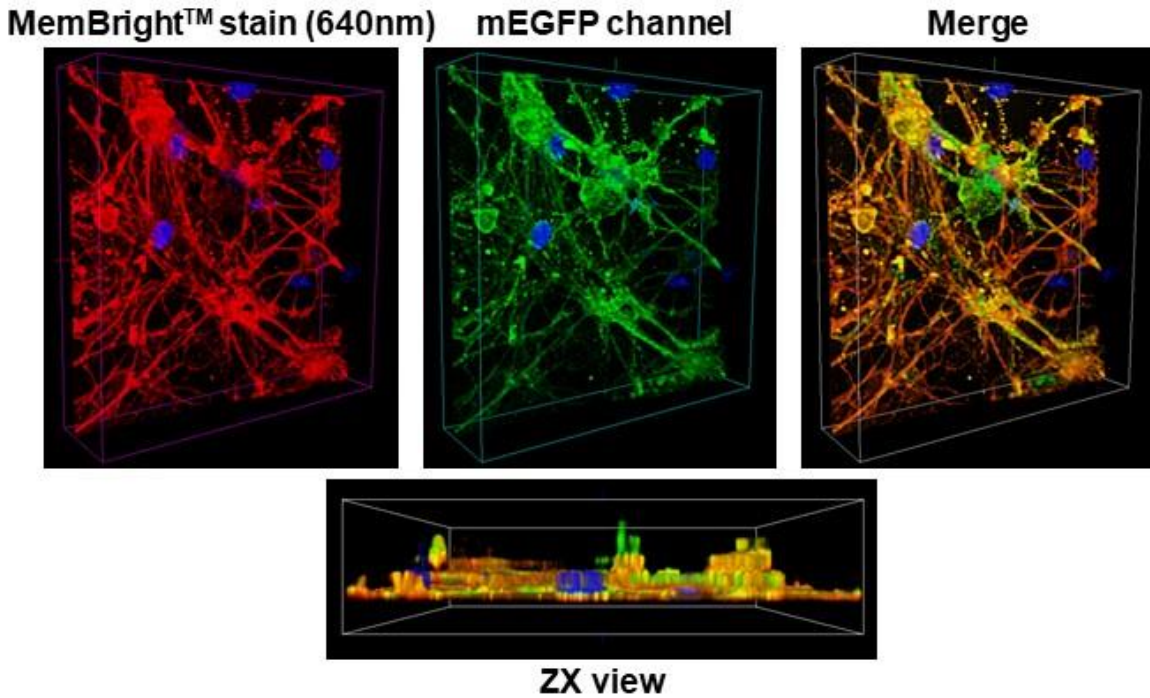

#### SI 3: M<sub>1</sub>-mEGFP is present at both the cell surface and at internal locations within neurons in culture

Cultures of combined hippocampal and cortical neurons maintained for 7 days were stained with MemBrite 640™ to label cell boundaries/plasma membrane (**red**) and with Hoechst 33342 (**blue**) to identify cell nuclei. Imaging of such cultures showed that whilst some of the M<sub>1</sub>-mEGFP (**green**) construct was present at the cell surface a significant proportion was intracellular. **A.** pseudo-3-dimensional representations. **B.** A ZX view of the same merged image as in **A.** Scale bar = 20 μm

## Supporting information 4

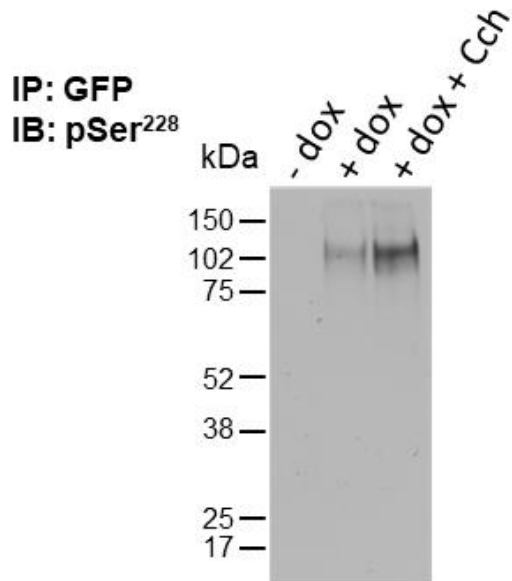

### SI 4: M<sub>1</sub>-mEGFP is phosphorylated at serine<sup>228</sup> following carbachol stimulation

Flp-In TREx 293 cells harboring M<sub>1</sub>-mEGFP (- Dox) or induced to express the receptor construct (+ Dox) were treated with 1 mM carbachol (+ Dox + Cch) for 5 min. Following enrichment of the receptor construct via GFP-trap immunoprecipitated proteins were resolved by SDS-PAGE. Immunoblot was performed with an anti-pSer<sup>228</sup> M<sub>1</sub> antiserum (22). A representative experiment is shown.
